# Supplementary material
Source: PubMed Central journal article supplement (PMC8569414)
Supplement: bloodBLD2021012752-suppl1.pdf [file bloodBLD2021012752-suppl1.pdf]

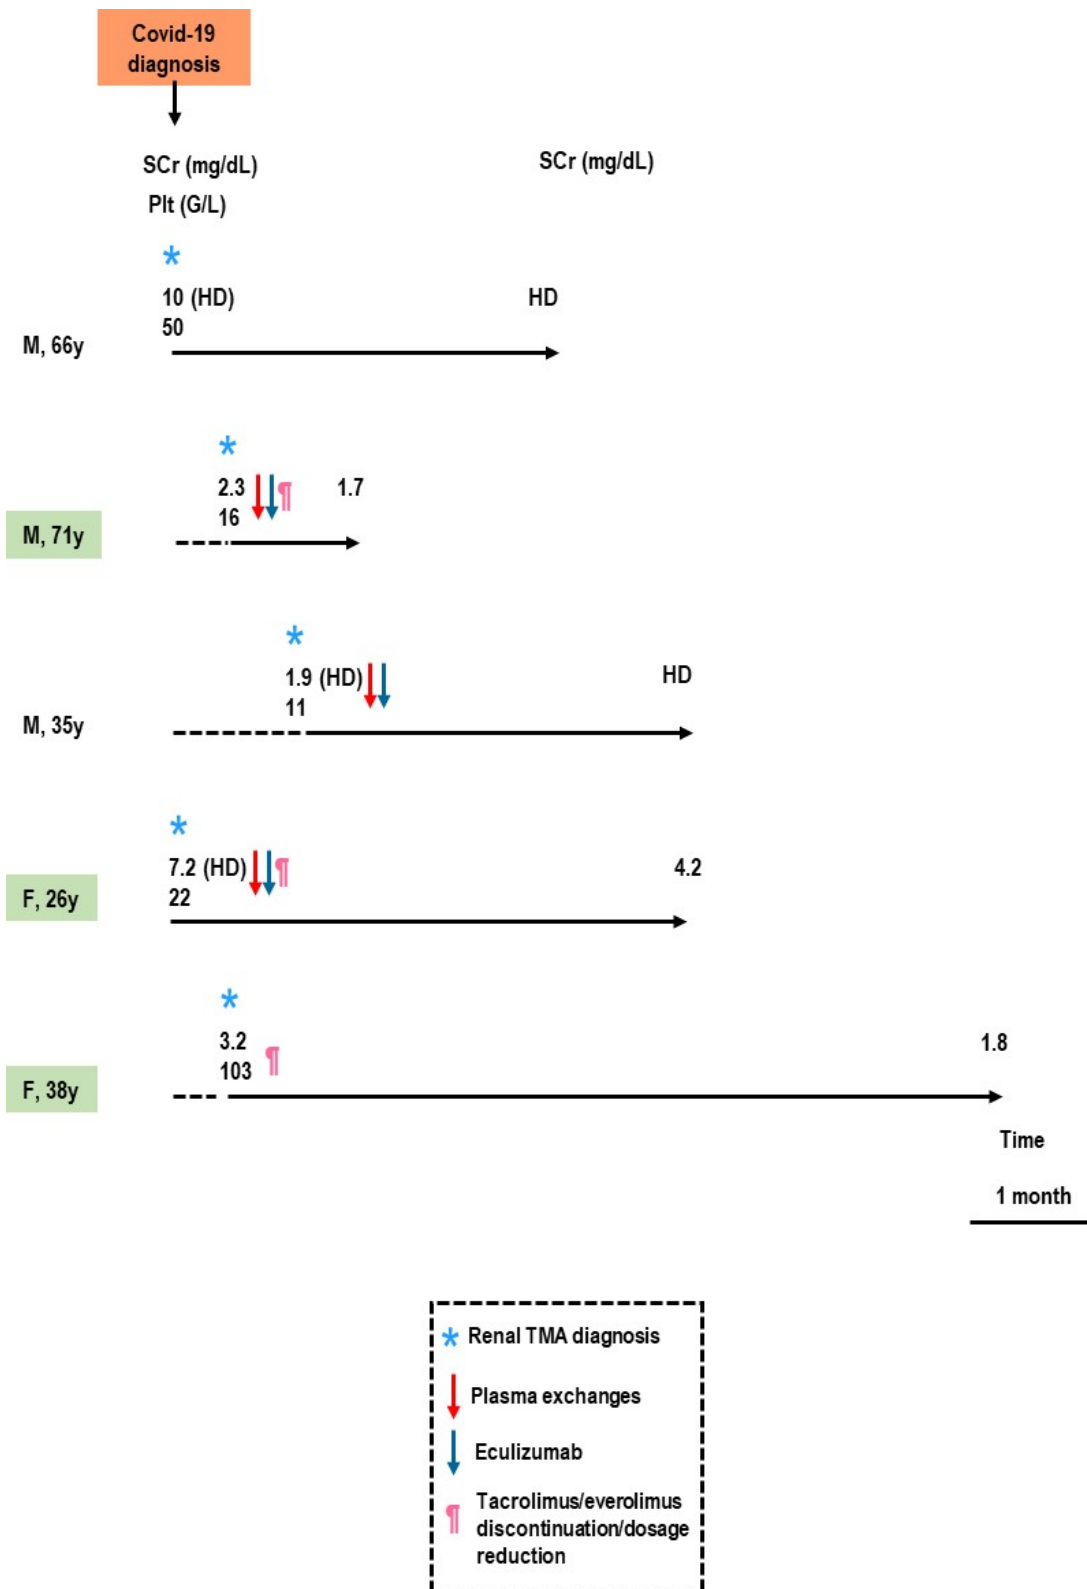

**Supplemental Figure S1:** Course of Covid-19-associated renal thrombotic microangiopathy (TMA) affecting the native kidneys or renal transplants (filled green rectangles). **Abbreviations:** M, male, F, female. Y, years. SCr, serum creatinine. Plt, platelet count. HD, hemodialysis.

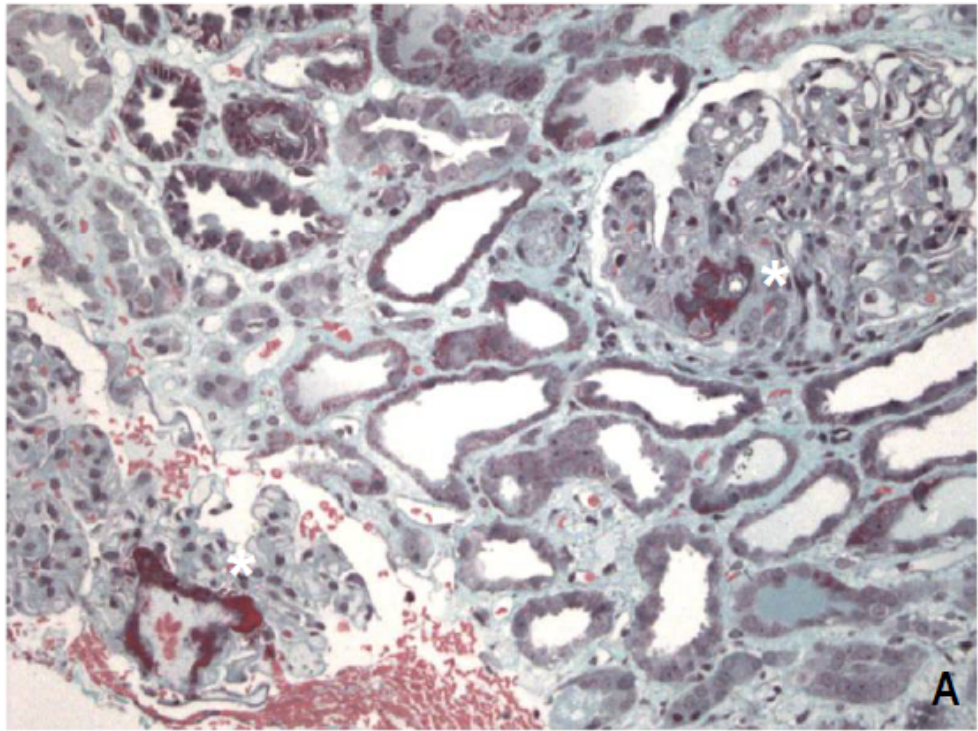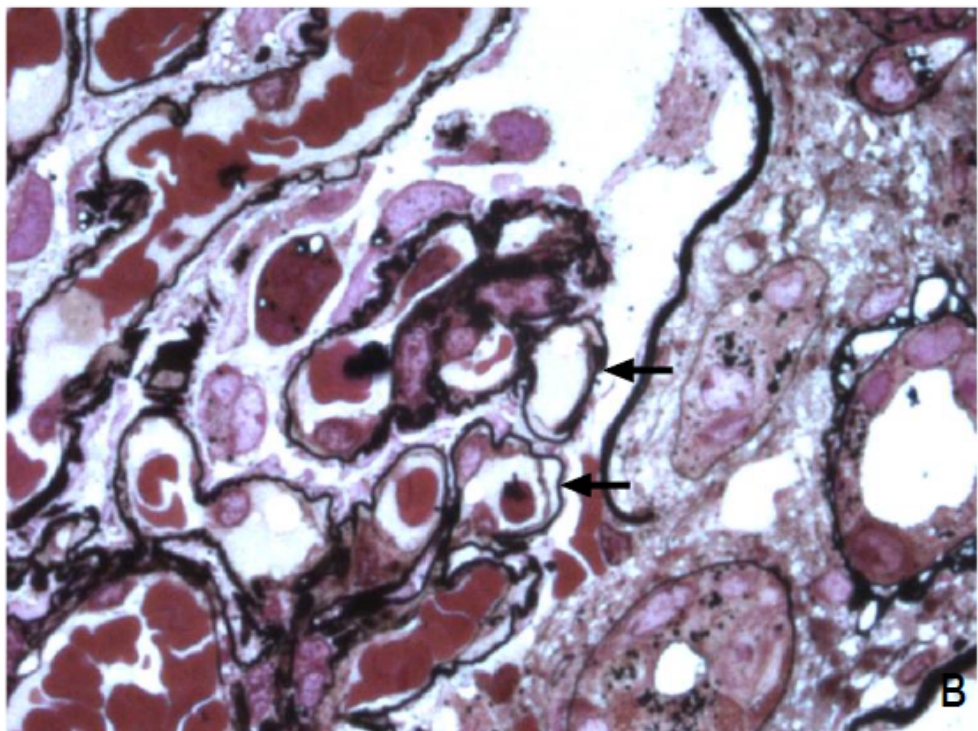

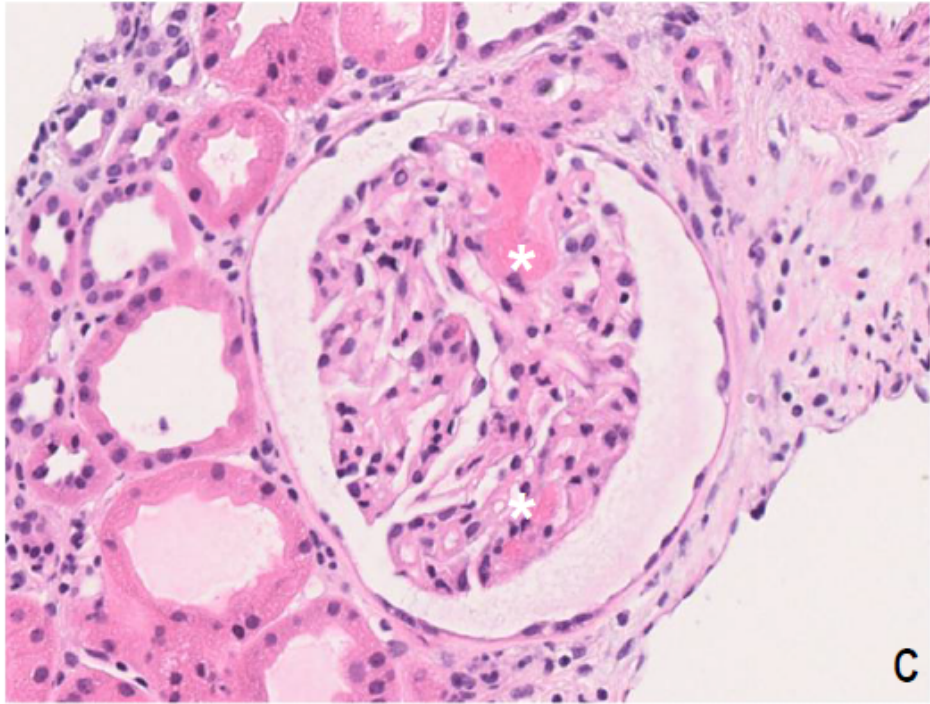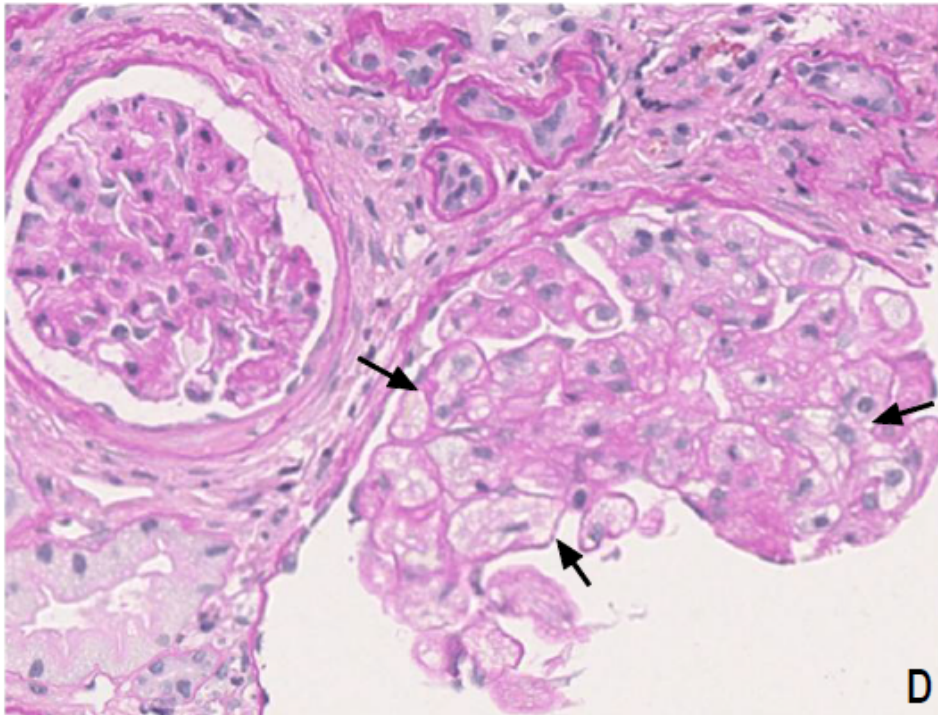



## **Supplemental Figure S2:**

**A-B.** Kidney biopsy performed in a 66-year old male patient who presented with COVID-19 associated thrombotic microangiopathy (patient 1).

A) Light microscopy. Masson's trichrome staining (original magnification x 200). Presence of thrombi (\*) in the glomerular capillaries. Acute tubular injury is also noted.

B) Light microscopy. Jones silver staining (original magnification x 1000). Features of endothelial swelling and detachment from the basement membrane (arrows).

**C-D.** Kidney biopsy performed in a 38-year old female kidney recipient patient who presented with COVID-19 associated thrombotic microangiopathy (patient 5).

C) Light microscopy. Hematoxylin and eosin staining (original magnification x 200). Presence of thrombi (\*) in the glomerular capillaries.

D) Light microscopy. Hematoxylin and eosin staining (original magnification x 200). Marked dilatation of glomerular capillaries with endothelial cells swelling (arrows).

| Ref | Gender, Age | NK//RT (nephropathy/ time from RT) | Time from Covid-19 diagnosis to TMA | At TMA diagnosis |           |           |                   |            |         | Kidney biopsy                                                                                                                           | Complement work-up                                                                                                                          | Covid-19 treatment                                                    | TMA treatment              | F-up | Outcome                                        |
|-----|-------------|------------------------------------|-------------------------------------|------------------|-----------|-----------|-------------------|------------|---------|-----------------------------------------------------------------------------------------------------------------------------------------|---------------------------------------------------------------------------------------------------------------------------------------------|-----------------------------------------------------------------------|----------------------------|------|------------------------------------------------|
|     |             |                                    |                                     | SCr (mg/dL)      | Plt (G/L) | Hb (g/dL) | Hapto. (0.3-2g/L) | LDH (xULN) | Puria   |                                                                                                                                         |                                                                                                                                             |                                                                       |                            |      |                                                |
| 1   | F, 69y      | NK                                 | 14d (symptoms onset)                | 2.6 (HD)         | 85        | 12.9      | < 0.2             | 4.4        | 1.4 g/L | Cortical necrosis. Glomerular thrombi.                                                                                                  | Elevated Bb and SC5b-9 plasma levels. Low FH level. No genetic data.                                                                        | HCQ LMWH Anakinra Tocilizumab Covalent plasma MV                      | Eculizumab (n=1)           | 23d  | Death                                          |
| 2   | M, 39y      | NK (IgAN)*                         | 6d                                  | 4.7              | 80        | 7.6       | < 0.1             | 2          | 4.2 g/d | Endocapillary proliferation, endotheliosis. GBM duplication. No thrombi. Muroid thickening/obliteration of a small artery. Chronic IgAN | Decreased plasma C3 and increased C3d and Bb plasma levels. C3 gene variant (c.481C>T; p.Arg161Trp). At-risk CD46 haplotype (GGAAC) (hom.). | -                                                                     | PE LMWH Eculizumab         | 49d  | HD                                             |
| 3   | M, 40s      | RT (Liddle syndrome /9y).          | 11d                                 | 8.79 (HD)        | 12        | 7.5       | < 0.6             | 2.9        | NA      | NA                                                                                                                                      | "Normal complement studies"                                                                                                                 | HCQ Azithromycin MP Reduced tacrolimus dose. Everolimus discontinued. | PE                         | 36d  | Recovery of renal function.                    |
| 4   | F, 49y      | RT (FSGS, 3M)                      | 9d                                  | 4.04             | 128       | 8.9       | 0.12              | 5          | NA      | Thrombi in small arteries. Obliteration of the hilar arteriolar lumina in glomeruli. Wrinkling of the GBM. ATN.                         | NA                                                                                                                                          | -                                                                     | Reduced tacrolimus dosage. | 36d  | SCr decreased to baseline levels (1.71 mg/dL). |

**Supplemental Table 1:** Characteristics of four previously reported cases of Covid-19 associated renal thrombotic microangiopathy (TMA).

**Abbreviations:** Pt, patient. NK, native kidneys. RT, renal transplantation. M, male, F, female, y, years. D, days. M, months. NAS, nephroangiosclerosis. FSGS, focal segmental glomerulosclerosis. IgAN, IgA nephropathy. ULN, upper limit of normal. F-up, follow-up. SCr, serum creatinine. Plt, platelet count. Hb, haemoglobin. Hapto, haptoglobin. LDH, lactate dehydrogenase. Puria, proteinuria. HD, hemodialysis. PE, plasma exchange. ATN, acute tubular necrosis. GBM, glomerular basement membrane. F-up, follow-up. HCQ, hydroxychloroquine. LMWH, low-molecular weight heparin. MV, mechanical ventilation. MP, methylprednisolone. Hom, homozygous. IgAN, IgA nephropathy. NA, not available.

\* The patient had a history of IgA nephropathy with chronic kidney disease (estimated glomerular filtration rate of 45 ml/min/1.73 m<sup>2</sup> and low-grade proteinuria (1 g/day).

## References:

1. Jhaveri KD, Meir LR, Flores Chang BS, et al. Thrombotic microangiopathy in a patient with COVID-19. *Kidney Int* 2020;98:509-12.
2. Mat O, Ghisdal L, Massart A, et al. Kidney Thrombotic MicroAngiopathy after COVID-19 associated with C3 gene mutation. *Kidney Int Rep* 2021.
3. Bascunana A, Mijaylova A, Vega A, et al. Thrombotic Microangiopathy in a Kidney Transplant Patient With COVID-19. *Kidney Med* 2021;3:124-7.
4. Jespersen Nizamic T, Huang Y, Alnimri M, Cheng M, Chen LX, Jen KY. COVID-19 Manifesting as Renal Allograft Dysfunction, Acute Pancreatitis, and Thrombotic Microangiopathy: A Case Report. *Transplant Proc* 2020.
